# Supplementary material for: Altered regulation of mesenchymal cell senescence in adipose tissue promotes pathological changes associated with diabetic wound healing
Source: PubMed Central journal article supplement (PMC8983691; doi:10.1038/s42003-022-03266-3), 2022-04-05
Supplement: 42003_2022_3266_MOESM2_ESM.pdf [file 42003_2022_3266_MOESM2_ESM.pdf]

Supplementary File for

**Diabetic wound impaired injury-induced transient senescence in adipose tissue that promotes the normal wound healing process**

**Authors: Arisa Kita MD<sup>1</sup>, Yuki Saito PhD<sup>2\*</sup>, Norihiro Miura<sup>3</sup>, Maki Miyajima PhD<sup>3</sup>,**

**Sena Yamamoto<sup>3</sup>, Tsukasa Sato<sup>3</sup>, Takatoshi Yotsuyanagi MD,PhD<sup>1</sup>, Mineko Fujimiya**

**MD, PhD<sup>2</sup>, and Takako S. Chikenji PhD <sup>2,3\*</sup>**

**Affiliations:**

1. Department of Plastic and Reconstructive Surgery, Sapporo Medical University, Sapporo, Japan
2. Department of Anatomy, Sapporo Medical University School of Medicine, Sapporo, Japan
3. Graduate School of Health Sciences, Hokkaido University, Sapporo, Japan.

**\*Corresponding authors:**

**Takako S. Chikenji**

Address: North12 West5, Kitaku, Sapporo, 060-0812, Japan

Telephone: 011-706-3382 FAX: 011-706-3382

Email: [chikenji@pop.med.hokudai.ac.jp](mailto:chikenji@pop.med.hokudai.ac.jp)

**Yuki Saito**

Address: South1 West17, Chuoku, Sapporo, 060-8556, Japan

Telephone: 011-611-2111 FAX: 011-618-4288

Email: [yuki.saito@sapmed.ac.jp](mailto:yuki.saito@sapmed.ac.jp)

Supplementary Figures

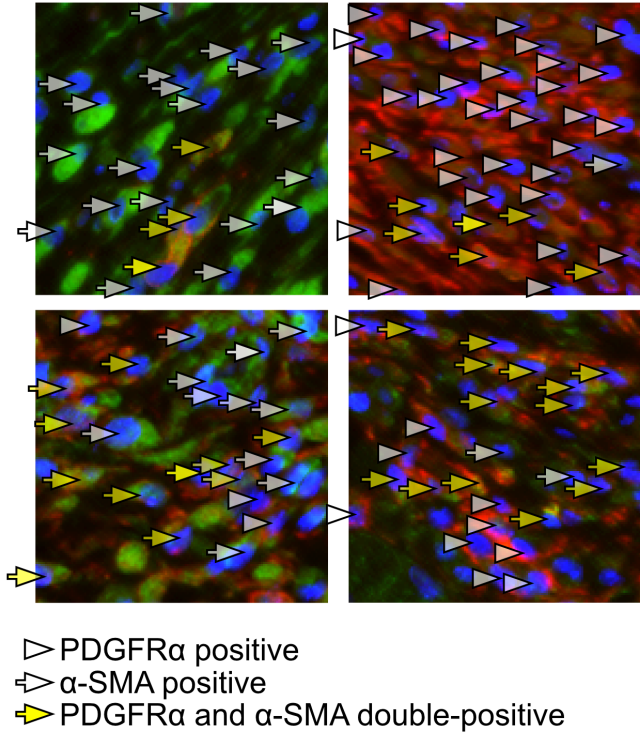

***Supplementary Figure 1. Representative images of the definition of PDGFRα and α-SMA positive cells***

White arrowheads indicate PDGFRα-positive cells, white arrows indicate α-SMA-positive cells, and yellow arrows indicate cells positive for both PDGFRα and α-SMA cells.

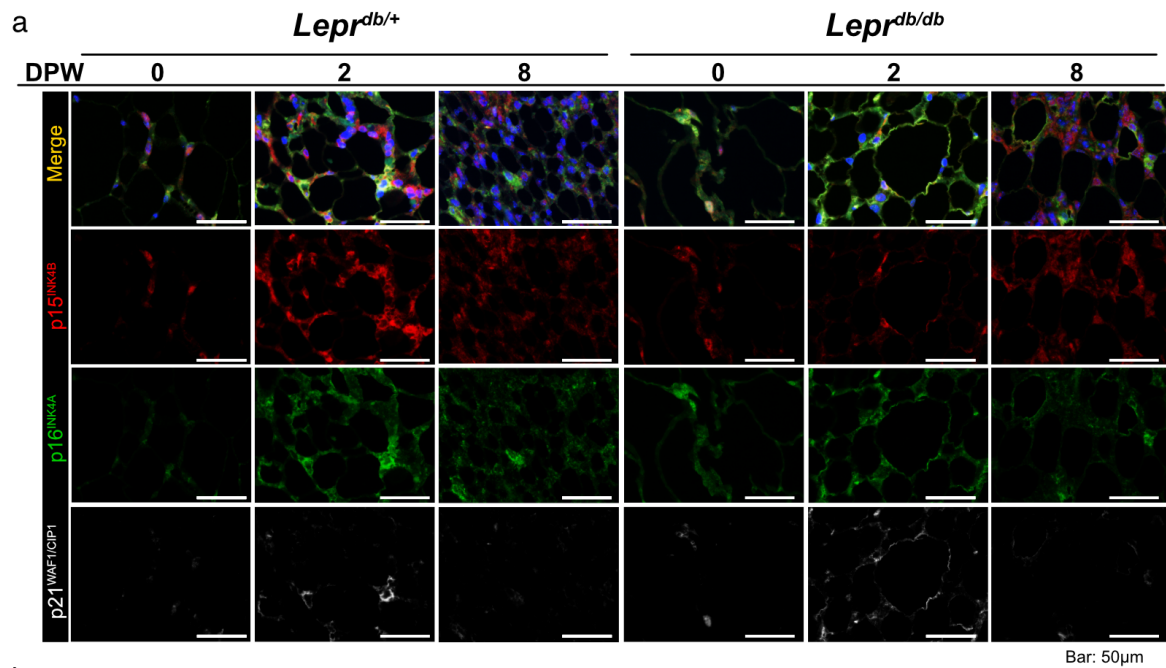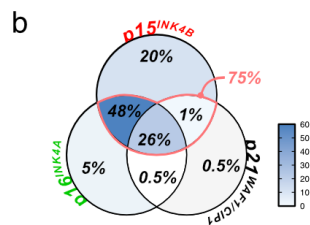

**Supplementary Figure 2. *p15<sup>INK4B</sup>, p16<sup>INK4A</sup>, and p21<sup>WAF1/CIP1</sup> expression in subcutaneous adipose tissue during wound healing in diabetic mice***

(a) Representative images of p15<sup>INK4B</sup>, p16<sup>INK4A</sup>, and p21<sup>WAF1/CIP1</sup> immunostaining of adipose tissue at pre-wounding, 2 DPW, and 8 DPW in *Lepr<sup>db/+</sup>* and *Lepr<sup>db/db</sup>* mice and (b) Venn diagram showing proportions of cells positive for any or all of p15<sup>INK4B</sup>, p16<sup>INK4A</sup>, and p21<sup>WAF1/CIP1</sup>.

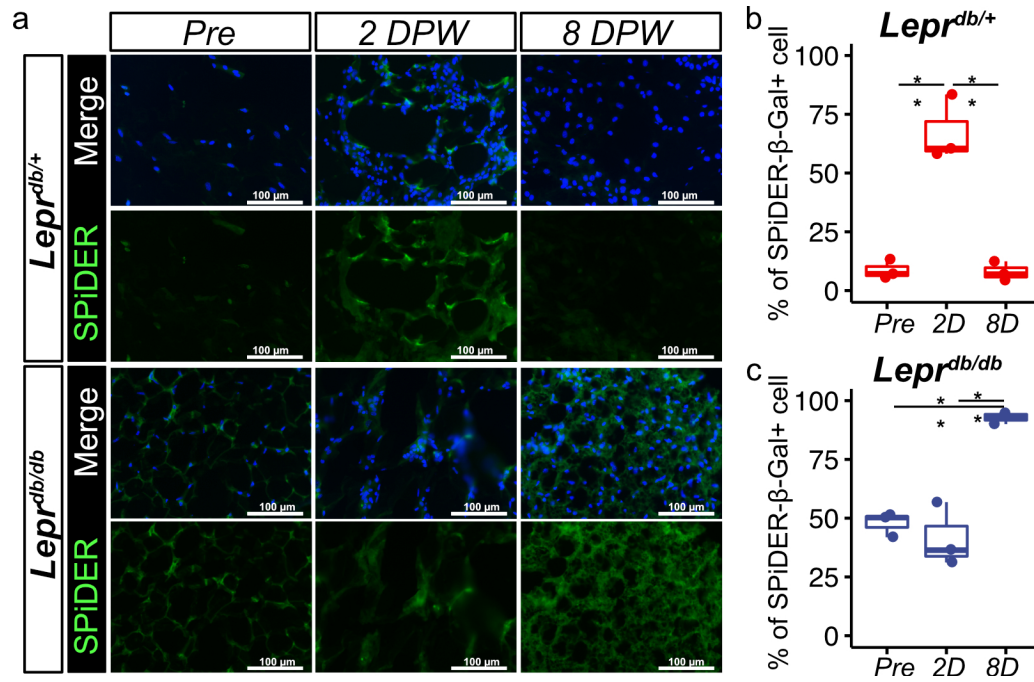

**Supplementary Figure 3. SPiDER-β-Gal staining in subcutaneous adipose tissue during wound healing in *Lepr<sup>db/+</sup>* and *Lepr<sup>db/db</sup>* mice**

(a) Representative images of SPiDER-β-Gal staining of adipose tissue, and (b–c) quantitative data for the percentage of SPiDER-β-Gal-positive cells ( $n = 3$  for each group) at pre-wounding, 2 DPW, and 8 DPW. Quantitative data are presented as box-and-whisker plots with IQRs and 1.5 times the IQR. p-values were determined using the Tukey method for one-way ANOVA ( $*p < 0.05$  and  $**p < 0.001$ ).

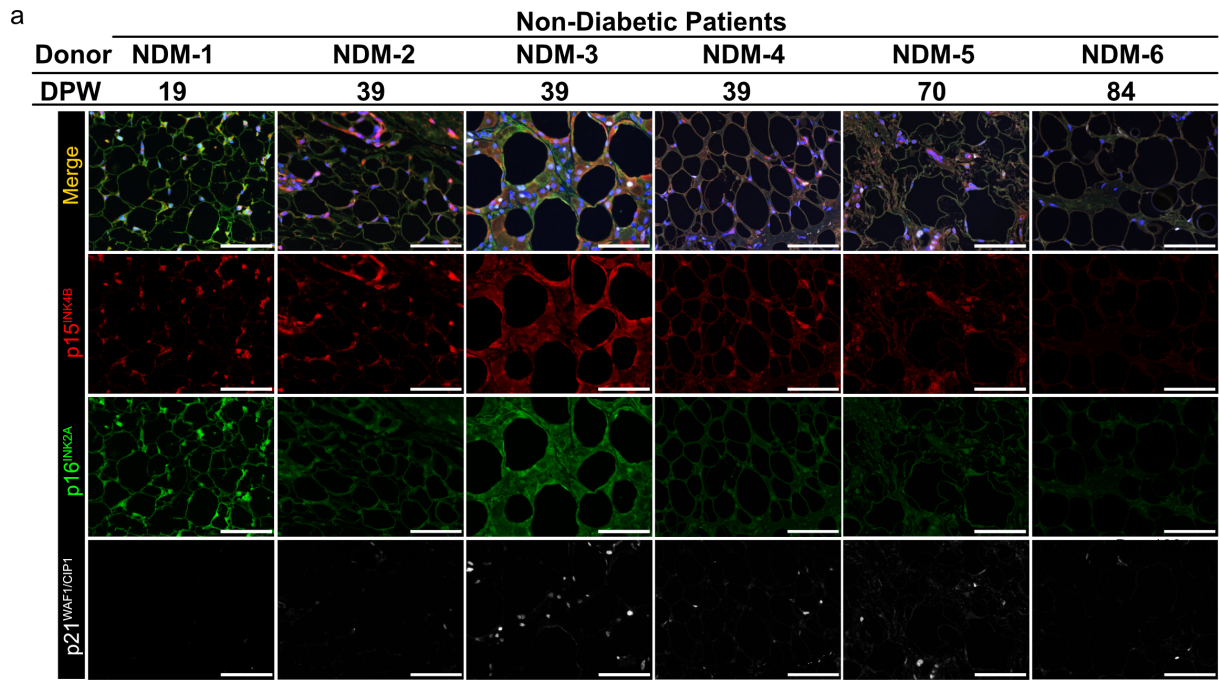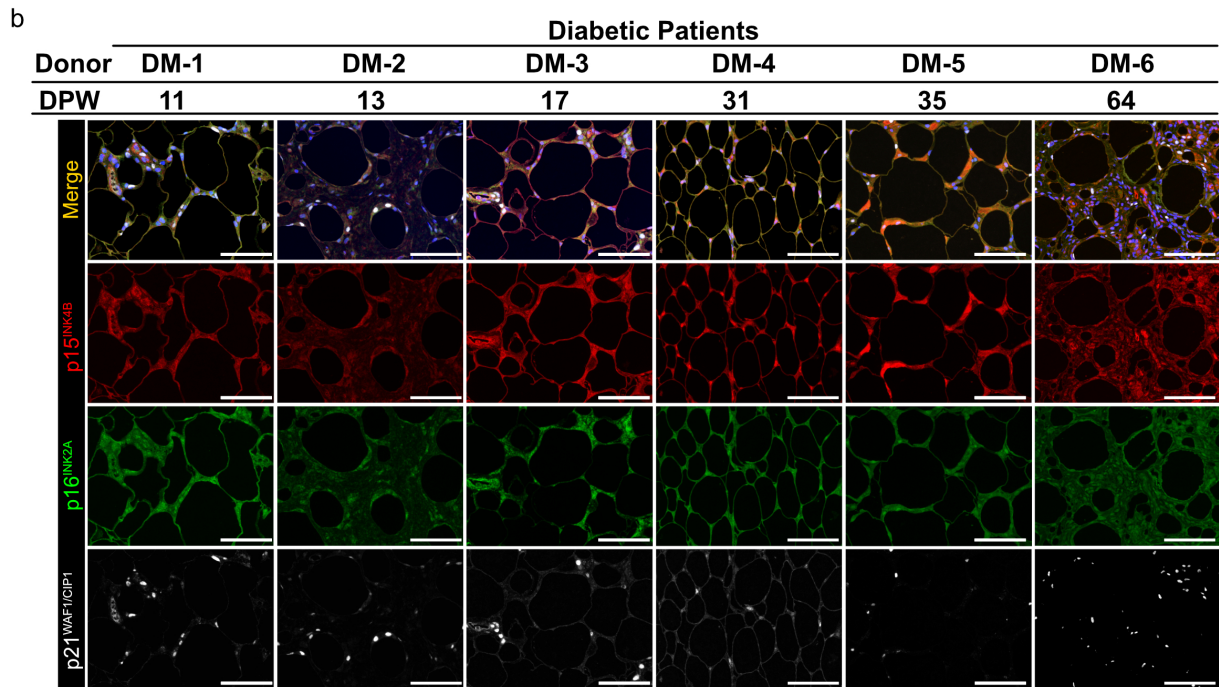

Bar: 100µm

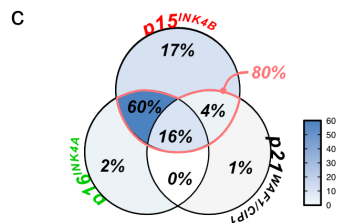

**Supplementary Figure 4.  $p15^{INK4B}$ ,  $p16^{INK4A}$ , and  $p21^{WAF1/CIPI}$  expression in subcutaneous adipose tissue during wound healing in diabetic patients**

**(a–b)** Representative images showing adipose tissue following immunostaining for  $p15^{INK4B}$ ,  $p16^{INK4A}$ , and  $p21^{WAF1/CIPI}$ . Tissue samples were collected tissue during wound healing in

diabetic or non-diabetic patients, and (c) Venn diagram plot showing proportions of cells positive for any or all of p15<sup>INK4B</sup>, p16<sup>INK4A</sup>, and p21<sup>WAF1/CIP1</sup>.

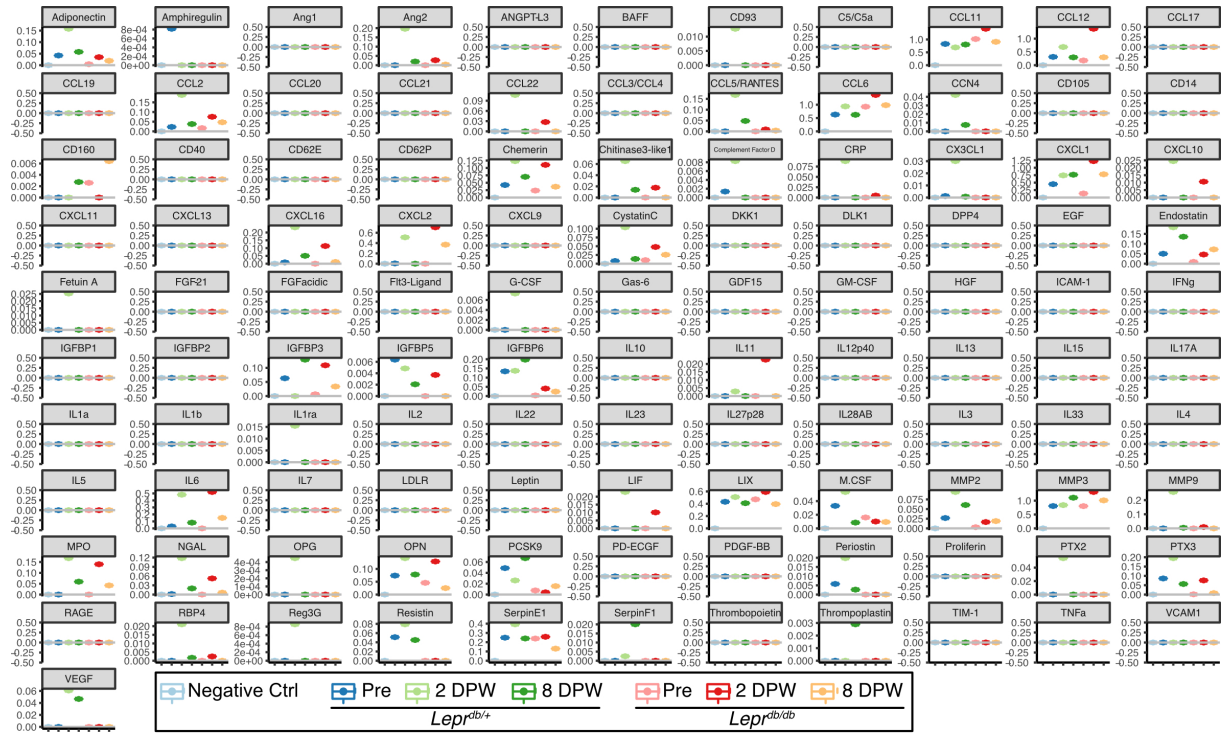

**Supplementary Figure 5. Quantitative data from Proteome profiler antibody array**

Quantitative data of Proteome profiler antibody array of SASP-containing culture media collected from organ culture of adipose tissue at pre-wounding, 2 DPW, and 8 DPW.

**Supplementary Table.1 Specific primer sequence used for real-time PCR**

| Gene            | Forward                       | Reverse                       | Size | Ascension Number |
|-----------------|-------------------------------|-------------------------------|------|------------------|
| <i>Cdkn2b</i>   | 5' AATAACTTCTACGCATTTTCTGC 3' | 5' CCCTTGGCTTCAAGGTGAG 3'     | 64   | NM_007670.4      |
| <i>Cdkn1a</i>   | 5' GTACTTCCTCTGCCCTGCTG 3'    | 5' AGAAGACCAATCTGCGCTTG 3'    | 183  | NM_007669.5      |
| <i>Trp53</i>    | 5' AGCATCTTATCCGGGTGGAAG 3'   | 5' CCCATGCAGGAGCTATTACACA 3'  | 157  | NM_011640.3      |
| <i>Serpine1</i> | 5' CCTCTCCACAAGTCTGATGCG 3'   | 5' GCAGTCCACAAGCTCATACTCG 3'  | 119  | NM_008871.2      |
| <i>Serpine2</i> | 5' ACTGTCTGCCATCATCCCTCAC 3'  | 5' GTAATGCCAAGGGCTTTCAGTGG 3' | 150  | NM_009255.4      |
| <i>IL6</i>      | 5' TACCACCTCACAAGTCGGAGGC 3'  | 5' CTGCAAGTGCATCATCGTTGTTT 3' | 116  | NM_031168.2      |
| <i>Tgfb1</i>    | 5' GCCTGAGTGGCTGTCTTTTGA 3'   | 5' CACAAGAGCAGTGAGCGTGAA 3'   | 101  | NM_011577.2      |
| <i>Pdgfra</i>   | 5' GCAGTGGCCTTACGACTCCAGA 3'  | 5' GTTTGGAGCATCTTACAGCCAC 3'  | 159  | NM_001083316.2   |
| <i>Acta2</i>    | 5' ACGCTGAAGTATCCGA 3'        | 5' CATTCTCCCGTTGG 3'          | 162  | NM_007392.3      |
| <i>Gapdh</i>    | 5' AGGTCGGTGTGAACGGATTTG 3'   | 5' TGTAGACCATGTAGTTGAGGTCA 3' | 123  | NM_001289726.1   |
| <i>Atcb</i>     | 5' CATTGCTGACAGGATGCAAGAAG 3' | 5' TGCTGGAAGTGGACAGTGAGG 3'   | 138  | NM_007393.5      |
